## Can Harvesting Flowers Reduce the Amount of Atmospheric Carbon Dioxide?

: The Case of Cherry Blossoms

Hannah Zo and Stephen J. Appleyard\*

The National Mathematics and Science College

*Westwood Way, Coventry, Warwickshire, CV4 8JB, United Kingdom*

### Author Note

\* Corresponding author's contacts

Email: [s.appleyard@natmatsci.ac.uk](mailto:s.appleyard@natmatsci.ac.uk)

Phone: +44 (0)24 7509 2950

1 Abstract

2 Cherry blossoms are popular as street trees in East Asia, providing an attractive backdrop to  
3 urban architecture, however their fallen petals can create a waste problem. These petals are likely  
4 to contain a significant proportion of fixed carbon so it is suggested that harvesting them may be  
5 a solution to both the waste problem and a means of quenching atmospheric CO<sub>2</sub> concomitantly.  
6 This study investigated the feasibility of flower harvesting for reducing atmospheric CO<sub>2</sub>. In  
7 particular, the total carbon (TC) stored in all cherry blossoms on streets was quantified in the  
8 geographic area of South Korea and compared to various CO<sub>2</sub> emission rates or amounts  
9 quenched by other methods. Branches with flowers were collected from different locations; the  
10 TC stored in them ranged between 41.5% - 44.8% of flower dry weights, resulting a mean flower  
11 TC per a metre of branch as 0.851±0.070 gC/m. A functional relationship of the sum of the two  
12 most apical branch lengths against crown diameter was developed to obtain an estimate of total  
13 flowering branch length from the crown diameter of a typical tree on street. The product of  
14 flowering branch length and flower TC per a metre of branch indicated that TC stored in all  
15 flowers of a tree summed to 336±163 g of carbon, equivalent to 1.23±0.60 kg CO<sub>2</sub> per tree, on  
16 average. The nationwide flower TC in each spring was calculated to be 1,900±920 tonnes of  
17 CO<sub>2</sub>, equivalent to the yearly carbon capture of 176 hectares of mature pine trees and carbon  
18 emissions from 0.24 million car operations each day. As compounds from cherry blossoms can  
19 be used extensively for pharmaceutical and cosmetic products, harvesting can be cost effective.  
20 Yet, its environmental costs and disposal after component extraction need to be considered  
21 altogether in a more complete life cycle analysis of diverting this product from landfill or  
22 decomposition.

23

24 *Keywords:* Cherry blossom trees; Flower harvesting; Street trees; CO<sub>2</sub> reduction; Total carbon  
25 content

26 **Can Harvesting Flowers Reduce the Amount of Atmospheric Carbon Dioxide?**  
27 **: The Case of Cherry Blossoms**

28 **Background**

29 One of the major challenges for recent generations of humanity has been global warming  
30 and the consequent climate change. Humans, collectively, have tried to adopt solutions to it in  
31 two major ways: reducing and quenching carbon dioxide (CO<sub>2</sub>). The first is to cut down the  
32 production of CO<sub>2</sub> through alternatives to burning fossil fuels as energy source. The other is to  
33 capture CO<sub>2</sub> existing in the atmosphere and fixing it to immobile carbon. Technologies like the  
34 Climeworks AG facility in Switzerland aim to employ ‘Direct Air Capture (DAC)’ whilst  
35 expending some energy to install and pump the captured gas into underground storage  
36 (Climeworks.com)<sup>22</sup>. However, plants appear to be more effective in terms of quenching. Mature  
37 trees planted in an area of 0.9 billion hectares can reduce about two-thirds of carbon in the  
38 atmosphere accumulated since the Industrial Revolution without energy cost (Crowther Lab of  
39 ETH Zurich, 2019)<sup>1</sup>.

40 Flowers are reproductive organs of plants. Unlike stems, leaves and roots, they are  
41 temporary in flowering trees. They are also made from atmospheric CO<sub>2</sub>. They are transient in  
42 nature and are quickly decomposed into organic molecules of carbon, nitrogen and others,  
43 ultimately releasing CO<sub>2</sub>. Thus, harvesting flowers, instead of natural or artificial decomposing,  
44 can have the effect of CO<sub>2</sub> quenching as it prevents some of the CO<sub>2</sub> from re-entering into the  
45 air.

46 Among all flowering trees, street and garden trees are the most accessible and controllable.  
47 The most abundant street flowering tree is cherry blossom in South Korea, consisting 28% of all  
48 street trees in Korea as of 2019 (Korea Forest Service, 2020)<sup>2</sup>. Their synchronised blooming in

49 similar climatic regions for a short period of time make the amount of floral waste substantial on  
50 streets in spring. Aesthetically pleasing scenery turns into environmental nuisance. It can be  
51 hypothesised that harvesting flowers on trees or fallen flowers not only eliminates nuisance but  
52 also prevents CO<sub>2</sub> from re-entering the atmosphere.

53 This research aims to evaluate the feasibility of reducing atmospheric carbon dioxide  
54 through flower harvesting of cherry blossoms. This study estimated the amount of carbon and  
55 CO<sub>2</sub> that can possibly be reduced by flower harvesting and discussed profitable applications of  
56 harvested flowers that can promote industrial-scale flower harvesting and waste treatment.

57

58 **Methods**

59 **Specimen collection**

60 Samples for measuring carbon contents in flowers were collected in four different locations  
61 in the southern part of South Korea (Table 1). For samples g1-6, apical branches 7 - 30 cm long  
62 with flowers was cut. They belonged to *Prunus x yedoensis* when identified by a set of  
63 taxonomic keys on flower and other parts. Keys for flowers used hairy style, cup-shaped calyx  
64 tube, and white or pink flowers in bundles of 3-6 flowers as criteria for identifying to species  
65 level (Han et al, 2022)<sup>19</sup>. Keys for other parts used gray-brown bark, toothed oval leaves in  
66 alternating arrangement with hair on the veins at the back to identify species (Kim, 1998)<sup>3</sup>.

67 Table 1. Sample information

| Sample | Date of collection | Sampling site                                   | Colour of flowers | Length of branches sampled (m) ( $\pm 1$ mm) |
|--------|--------------------|-------------------------------------------------|-------------------|----------------------------------------------|
| g1     | 2022/04/17         | 36.556N, 128.531E<br>Andong-si Pungcheon-myeon  | White             | 0.185                                        |
| g2     | 2022/04/17         | 36.552N, 128.530E<br>Andong-si Pungcheon-myeon  | Pink              | 0.303                                        |
| g3     | 2022/04/17         | 36.552N, 128.530E<br>Andong-si Pungcheon-myeon  | Pink              | 0.271                                        |
| g4     | 2022/04/17         | 36.552N, 128.530E<br>Andong-si Pungcheon-myeon  | Pink              | 0.215                                        |
| g5     | 2022/04/16         | 35.697N, 128.021E<br>Geochang-gun, Gajo-myeon   | White             | 0.083                                        |
| g6     | 2022/04/16         | 35.659N, 127.891E<br>Geochang-gun, Geochang-eup | White             | 0.077                                        |

## 68 **Measurement of total carbon in cherry blossom flowers**

69 Flowers were cut up into receptacles from the stems. Six samples of flowers were dried at  
70 80°C for 48 hours in an oven. Dry weights of each flower sample were measured by precision  
71 balance (ED423S, Satorius, Germany) with nominal standard error of measurement  $\pm 0.5$ mg.  
72 Dried flower samples were ground with mortar and pestles cleaned with 0.1N HCl. Each sample  
73 was put into a labelled vial and sent to a TOC analysis service (Aurora 1030D TOC Analyzer, OI  
74 Analytical Corporation, Texas) to determine the average mass of carbon per 50 mg dry weight  
75 and the average % carbon content. TC of each ground flower samples were measured in  
76 triplicates.

77

## 78 **Calculating the mass of carbon in flowers per tree**

### 79 **Amount of flower TC on a branch**

80 The branch lengths of flower samples were measured using a meter ruler with nominal  
81 standard error of  $\pm 1$  mm (Table 1). In addition, the carbon mass in flowers was calculated by  
82 multiplying avg. % carbon content by the mass of flowers (dry wt.). The flower TC of each  
83 branch was divided by its length; the values were then averaged to produce a mean value of  
84 flower TC stored per metre of branch (g/m). It was assumed that flowers were equally distributed  
85 along branches with flowers across the tree based on results of a preliminary analysis. The  
86 analysis involved counting flowers on apical and subapical branches and determining a linear  
87 relationship with branch length or basal area of a branch. Results of the analysis was presented in  
88 the Results section.

## 89           **Mean crown diameter of cherry blossom trees on streets of Korea**

90   Twenty regions where abundance of cherry blossom tree was well known  
91   were selected for geographically even sampling of street trees. Ten images of  
92   tree crowns with contrast to background and discrete crown were randomly  
93   selected in each of 20 regions for measurement of their crown diameter. The  
94   shortest and the longest crown\_diameters of each tree were measured on  
95   satellite images of tree crown with ‘Distance Measurement’ function in Naver  
96   Map application (Naver, Korea; Fig. 1). The mean of all crown diameters for  
97   200 trees was adopted as the average crown diameter of typical cherry  
98   blossom trees on streets in South Korea.

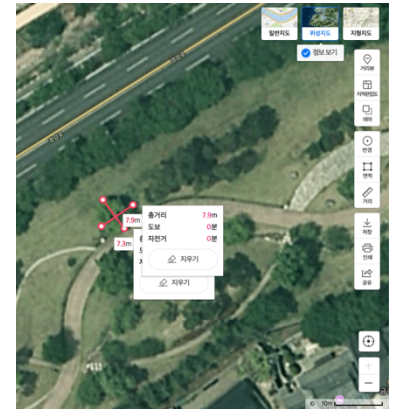

Figure 1. An example of measuring the shortest and the longest crown diameters of a tree.

## 99           **Mean flower TC of cherry blossom trees on streets of Korea**

100       To obtain total flower TC on a tree based on mean flower TC values on a metre of branch, a  
101   functional relationship was developed by plotting a regression curve of total length of flowering  
102   branches (TLFB) of a tree against its crown diameter. TLFB was determined as apical and  
103   subapical branches because cherry blossom trees form their flowers mostly on these branches  
104   (see ‘Discussion’ for further details). By applying the mean crown diameter of cherry blossom  
105   trees on streets of Korea (described above) as parameter in the function, the mean value of total  
106   branch length of a tree on streets of Korea was obtained. The mean value of total flower TC of a  
107   tree on streets of Korea was calculated as the product value between the mean value of TLFB  
108   and flower TC values on a metre of branch. The process of developing the function converting  
109   crown diameter of a tree into TLFB of the tree is described below.

110 ***Selecting trees for estimating number and length of branches***

111 Trees showing crowns of diameter of 2 - 10 m, circular shape, and interspace from other  
112 trees were selected from satellite images on the city of Busan. Among the trees, five trees  
113 showing crown diameters approximately 2, 4, 6, 8, or 10 m respectively were randomly selected  
114 for non-destructive estimation of branch parameters.

115 ***Counting the number of branches by branch orders***

116 Branches were identified as their respective orders. Branch order is defined using the  
117 framework of Strahler ordering of branches as reference (Fig. 2A). A ‘branch’ was defined as a  
118 collection of adjoining segments until the point of separation at the tip (Eloy et al., 2017)<sup>4</sup>. In this  
119 investigation, the most apical branch was ranked as the first order and the second most apical as  
120 second, and so on.

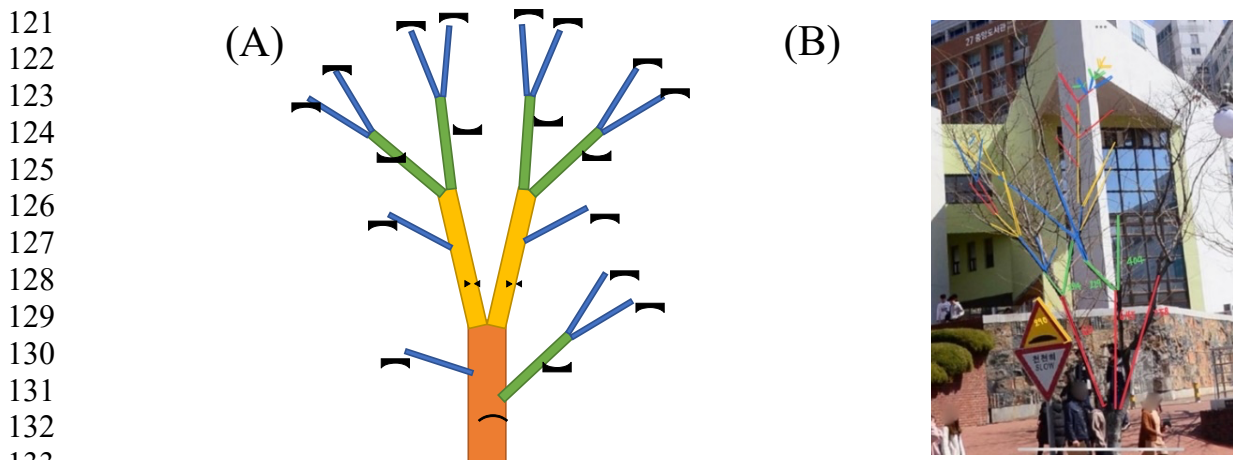

134 Figure 2. Definition of branch order (A). Schematic illustration for Strahler ordering of branches, (B) An example of assigning  
135 orders.

136 The number of branches of an order was determined by counting the number of branches  
137 originated from one branch of the previous order. One of the major branches emerging from the  
138 trunk of a tree were selected for counting branches of child orders. The average number of  
139 branches at each order were calculated from all child branches originating from the major



140 branches. The total number of branches in a child order was calculated as the product of the  
141 mean number of the child order and the mean number of the mother order.

#### 142 ***Branch lengths at each order***

143 The lengths of apical (i.e., the first order) and subapical (i.e., the second order) branches  
144 were measured in app pixel units by the ‘Ruler’ function in Apple Notes app (iOS 15.6) on  
145 images of tree branches. Simultaneously, actual lengths of some parts of branches were actually  
146 measured non-destructively on site by a laser distance meter (SD-70, Sincon, China) and  
147 trigonometric calculation. The ratio of meter unit to app unit was calculated for those parts. The  
148 mean length of each order of branches was converted to meter unit using the ratio as the  
149 conversion factor.

#### 150 ***Total length of flowering branches of a tree***

151 The total number and the mean length of branches for the first and the second order was  
152 multiplied to give a sum of branch lengths for a sector of the tree crown formed by all branches  
153 originating from one basal branch used for branch counting and length measurement. The central  
154 angle of the crown sector occupied by child branches of one basal branch was estimated using  
155 the satellite image of tree crown and the ‘Angle’ function in Apple Notes. The ratio of the central  
156 angle of the sampled sector to 360 degrees were used as conversion factor to extrapolate the total  
157 flowering branch length for the whole crown of a tree from the sampled sector.

158

#### 159 **Total carbon content in cherry blossom flowers in South Korea**

160 The mean value of total flower TC of a tree on streets of Korea was multiplied by the total  
161 number of cherry blossom trees on streets and gardens of South Korea to obtain the nationwide  
162 flower TC formed each spring. The tree distribution statistics in Korea were obtained from the

163 Korea Forest Service<sup>2</sup>. The nationwide flower TC was converted into the nationwide CO<sub>2</sub>  
164 equivalent unit by multiplying the ratio of molecular weights of CO<sub>2</sub> to elemental carbon.

165 **Results**

166 **Abundance of flowers per unit length of branches order**

167 To extrapolate total amount of flowers on a tree from parameters of its crown and branches,  
168 distribution of flowers on branches of different orders was analyzed. For sweet cherry (*Prunus*  
169 *avium* L.), it has been reported that its flower density was proportional to the logarithm of branch  
170 length (Jacyna et al, 2021)<sup>17</sup>. For the case of sour cherry (*Prunus cerasus* L.), the number of  
171 flowers per basal area of a branch on a tree was reported to be constant (Hrotkó et al, 2008)<sup>18</sup>. In  
172 both sweet and sour cherries, flowers formed mostly on apical (branch order 1) and subapical  
173 (order 2) branches. In this study, it was checked whether it is branch length or basal area that  
174 better determines flower abundance on branches of *P. × yeodoensis*.

175 For cherry blossom trees in Busan, South Korea, the number of flowers on apical (order 1)  
176 and subapical (order 2) branches of various lengths were counted. Flower abundance of the cherry  
177 blossom branches were not related to basal areas of subapical branches, and the correlation  
178 between flower abundance and basal areas of apical branches was relatively weak (Fig. 3B).  
179 However, branch length explained difference of flower abundance by branches with high levels of  
180 proportionality for both apical and subapical branches ( $R^2 > 0.7$ , Fig. 3A). When both order 1 and

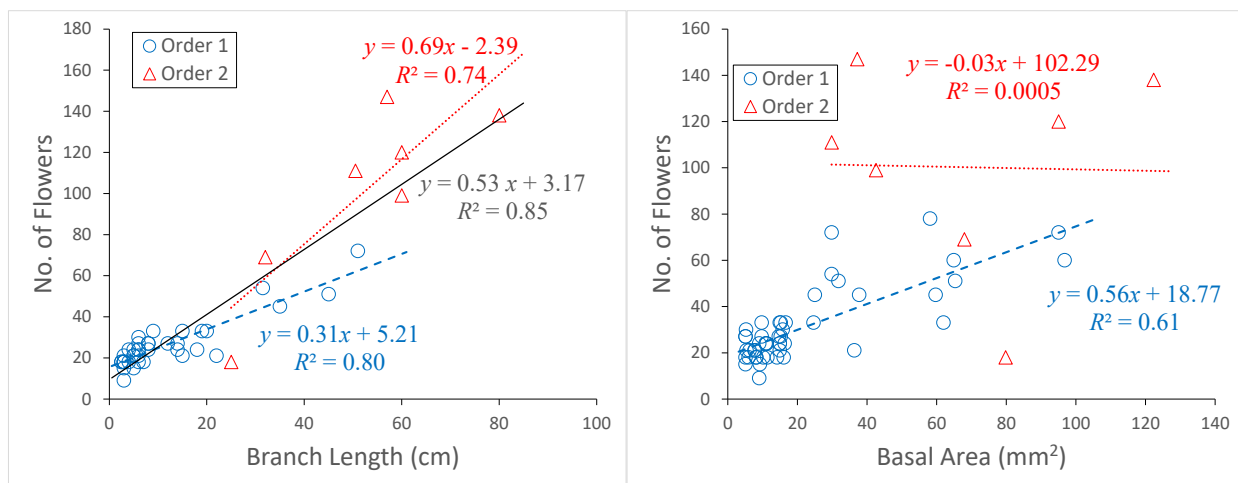

Figure 3. Relationship between length and basal area of apical and subapical branches of a cherry blossom tree.

181 order 2 branches were combined, flower abundance was best fitted to a linear equation with the  
182 highest  $R^2$  (0.85). This result implied that cherry blossom flowers were distributed evenly along  
183 an orders 1 and 2 branches. Therefore, we could estimate flower abundance of a branch by its  
184 length using the equation of  $N = 0.53L + 3.17$ , where  $L$  stood for branch length (cm) and  $N$  for  
185 flower abundance.

186

### 187 **Total carbon content in unit mass of flowers**

188 For the six flower samples (g1- g6, Table 1), TC was analyzed by TOC analyser. Per dry  
189 weight of flowers, 41.5% - 44.8% of the mass was due to carbon elements out of  $367 \pm 174$  g of  
190 flower dry weights (Table 2). These values are similar to the carbon content ( $45.01 \pm 5.23\%$ ) of  
191 reproductive organ measured for 142 plants sampled globally (Ma et al, 2018)<sup>20</sup>, implying that  
192 carbon content of cherry blossom flowers varies by habitat condition to some extent but within  
193 the range of that of typical plants. The average percentage carbon content per dry weight of  
194 flowers was concluded to be  $43.45 \pm 2.03\%$ .

195

### 196 **Flower carbon content on unit length of branches**

197 To estimate carbon mass of flowers on the sample branches, dry weights of the flower  
198 samples were multiplied by % carbon value for each sample (Table 2). The sample branches  
199 were estimated to have 0.06 – 0.24 grams of carbon. By multiplying the length of each sample  
200 branch to flower carbon mass of each branch, flower carbon mass per metre of sample branch  
201 was obtained (Table 2). On average, the sample branches had  $0.851 \pm 0.070$  gC per metre of  
202 branch, and this value was used as the estimate of flower TC per metre of branches of cherry  
203 blossom trees in Korea in further analysis.

204 Table 2. Mass, carbon content and length of samples used to calculate flower carbon on unit length of branch

| Sample | Avg. mass per 50 mg dry weight of flowers (mgC) | Avg. % carbon | Mass of flowers (mg) | Flower carbon mass (gC) | Branch length (m) | Flower carbon per metre of branch (gC/m) |
|--------|-------------------------------------------------|---------------|----------------------|-------------------------|-------------------|------------------------------------------|
| g1     | 22.3±0.75                                       | 44.6±1.50     | 393                  | 0.18                    | 0.185             | 0.947                                    |
| g2     | 21.1±0.70                                       | 42.2±1.40     | 530                  | 0.22                    | 0.303             | 0.739                                    |
| g3     | 21.6±0.79                                       | 43.3±1.57     | 547                  | 0.24                    | 0.271             | 0.873                                    |
| g4     | 22.2±0.74                                       | 44.4±1.48     | 420                  | 0.19                    | 0.215             | 0.865                                    |
| g5     | 22.4±0.83                                       | 44.8±1.66     | 162                  | 0.07                    | 0.083             | 0.875                                    |
| g6     | 20.7±0.65                                       | 41.5±1.31     | 151                  | 0.06                    | 0.077             | 0.809                                    |

205

206

### 207 **Total carbon content in unit length of branches**

208 Since we have the estimate of mean flower TC per metre of branches of cherry blossom  
209 trees in Korea, TC in all flowers of a tree could be calculated by estimating total length of all  
210 flowering branches of a tree (Table 3).

### 211 **Total length of flowering branches in a tree**

212 As a way of summing up lengths of all flowering branches, we estimated an average number  
213 of branches and mean branch length at each order. The five trees used as sample cases of trees  
214 with different crown sizes showed orders of branches up to 4 – 8. Since most flowers are formed  
215 on apical or subapical branches, lengths of the first and the second order were summed. The total  
216 number of apical branches reached 631 for the sampled sector of the largest tree. The mean  
217 branch length of apical branches was 89±41 cm and that of subapical branches was 225±141 cm,  
218 indicating subapical branches are longer by 2.5-fold. The total lengths of branches at the first and  
219 the second order was calculated as the products of mean branch number and mean branch length  
220 of each order. The total flowering branch length in each sector of a tree crown was calculated by  
221 adding branch lengths of the two orders. The sector-wide branch length was extrapolated to the  
222 total branch length of whole crown for a tree based on the central angle of the sampled sector.

223 Central angles of the sampled sectors ranged 48-108°, and the extrapolated TLFB in a tree  
224 ranged from 108 m for the smallest to 946 m for the largest tree.

225 Table 3. Total branch length of a tree: considering the order of branches and the angle occupied by the sampled crown sector

| Tree | Crown diameter (m) | Order | Total number of branches for each order in the sampled sector | Mean length of branches at each order in the sampled sector (m) | Total branch lengths at each order in the sampled sector (m) | Central angle for sampled crown sector | Total length of flowering branches for whole crown (m) |
|------|--------------------|-------|---------------------------------------------------------------|-----------------------------------------------------------------|--------------------------------------------------------------|----------------------------------------|--------------------------------------------------------|
| #1   | 2.50               | 1st   | 53                                                            | 0.31                                                            | 16.6                                                         | 100°                                   | <b>108</b>                                             |
|      |                    | 2nd   | 16                                                            | 0.85                                                            | 13.5                                                         |                                        |                                                        |
| #2   | 4.55               | 1st   | 207                                                           | 0.15                                                            | 31.2                                                         | 97°                                    | <b>161</b>                                             |
|      |                    | 2nd   | 35                                                            | 0.36                                                            | 12.3                                                         |                                        |                                                        |
| #3   | 6.00               | 1st   | 540                                                           | 0.11                                                            | 57.5                                                         | 108°                                   | <b>314</b>                                             |
|      |                    | 2nd   | 180                                                           | 0.21                                                            | 37.0                                                         |                                        |                                                        |
| #4   | 8.00               | 1st   | 76                                                            | 0.17                                                            | 19.3                                                         | 48°                                    | <b>413</b>                                             |
|      |                    | 2nd   | 52                                                            | 0.57                                                            | 35.8                                                         |                                        |                                                        |
| #5   | 9.65               | 1st   | 631                                                           | 0.25                                                            | 156.1                                                        | 75°                                    | <b>946</b>                                             |
|      |                    | 2nd   | 100                                                           | 0.41                                                            | 40.9                                                         |                                        |                                                        |

226

227

#### **Function for converting crown diameter to total branch length of a tree**

228 A linear positive correlation could be observed between the crown diameter ( $x$ ) of a tree and

229 the log of its TLFB ( $y$ ), producing a function of  $y = 47.9 e^{0.30x}$  by exponential regression (Fig. 4).

230 The estimates were highly significant since 96.6% of variance in the length could be explained

231 by crown diameter. The function allowed us to obtain TLFB of any cherry blossom tree from its

232 crown diameter between 2.5 – 9.6 m by simply measuring its crown diameter.

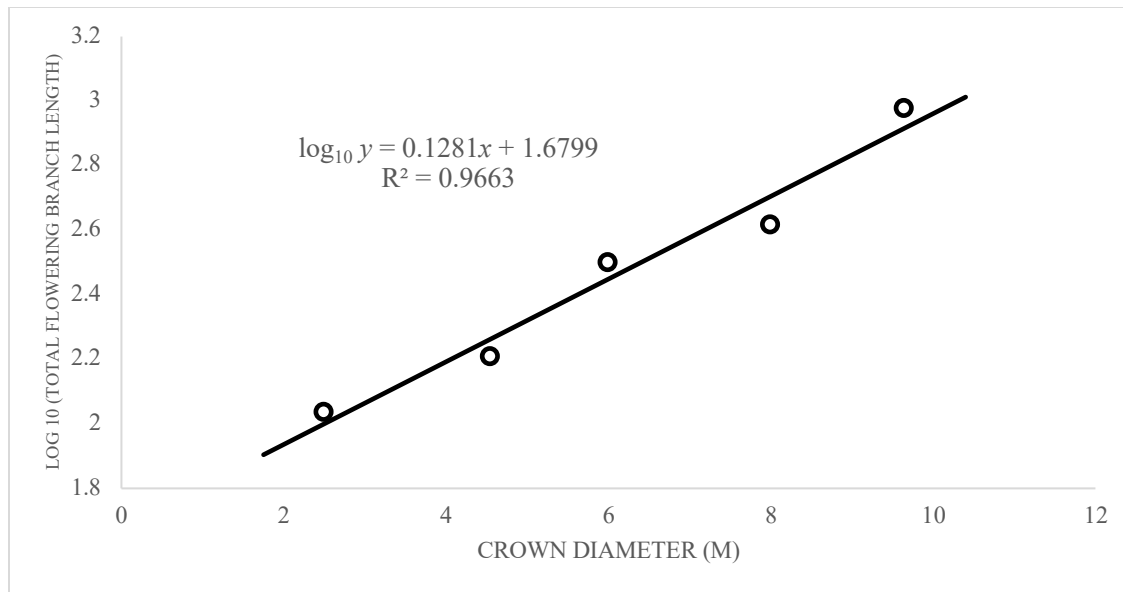

233

234 Figure 4. Relationship between the crown diameter and the total length of apical and subapical branches.

235

### 236 **Estimating flower TC of a tree by its crown diameter**

237 Having an estimate of mean flower TC per metre of branches of cherry blossom trees in  
238 Korea (Table 2) and a function to convert crown diameter into TLBF of a tree (Fig. 4), flower  
239 TC of a tree could be calculated by multiplying by 0.851 g of flower TC per metre of branches to  
240 its TLBF, converted from its crown diameter.

241

### 242 **Nationwide carbon content in cherry blossom flowers in South Korea**

243 The mean crown diameter of cherry blossom street trees across the country was  
244 obtained by sampling 200 different trees and taking the average (Table 4). This was then  
245 converted into an estimate of total flowering branch length of a typical cherry blossom tree on  
246 Korean streets using the conversion function (Fig. 4). The product of TLFB and the mean flower  
247 TC in a metre of a branch was multiplied by the number of street trees in the country. This gave

248 the final value indicating TC in all cherry blossoms in South Korea. The estimation of each  
249 parameter is presented below.

### 250 **Crown diameter of typical cherry blossom trees on Korean streets**

251 Ten trees from each of 20 different locations scattered across the country were randomly  
252 selected for crown diameter measurement (Table 4). Based on the diameters of the 200 trees, the  
253 mean crown diameter of mature cherry blossom trees across the country was estimated as  
254  $7.15 \pm 1.59$  m.

255 Table 4. Average crown diameter of ten trees selected randomly in each region

| Region                       | Coordinate of the centre of region | Mean crown diameter (m) | SD (m) |
|------------------------------|------------------------------------|-------------------------|--------|
| Hwahweo village, Andong      | 36.5389°N, 128.5181°E              | 8.98                    | 1.92   |
| Andong dam, Andong           | 36.5684°N, 128.7294°E              | 8.24                    | 2.38   |
| Gyeongang-ro, Gyeongju       | 35.8365°N, 129.2196°E              | 7.40                    | 1.88   |
| Daewoo marina, Busan         | 35.1602°N, 129.1467°E              | 7.96                    | 1.69   |
| Kyungsung University, Busan  | 35.1398°N, 129.0985°E              | 8.67                    | 2.35   |
| Hogupo-ro, Incheon           | 37.4184° N, 126.7117° E            | 6.80                    | 0.82   |
| Gwanchok-ro, Nonsan          | 36.2011° N, 127.0995° E            | 5.19                    | 0.76   |
| Sang-dong, Jeong-eup         | 35.5605° N, 126.8715° E            | 4.95                    | 0.80   |
| Jeseok-ro, Gwangju           | 35.1208° N, 126.9071° E            | 6.13                    | 1.59   |
| Daewon-sa, Bosung-gun        | 34.9613° N, 127.1330° E            | 6.80                    | 1.75   |
| Gyeongpo-ro, Gangreung       | 37.7839° N, 128.8889° E            | 6.57                    | 1.05   |
| Parkchunghee-ro, Gumi        | 36.1076° N, 128.3529° E            | 4.77                    | 0.63   |
| Hwagae-ro, Hadong-gun        | 35.2268° N, 127.6367° E            | 7.93                    | 1.13   |
| Yeojuwacheon-ro, Changwon-si | 35.1594° N, 128.6602° E            | 10.03                   | 1.58   |
| Palgonsan-ro, Daegu          | 35.9794° N, 128.6654° E            | 5.04                    | 0.76   |
| Yeojuiseo-ro, Seoul          | 37.5338° N, 126.9202° E            | 6.66                    | 1.27   |
| Moosim-cheon, Cheongju       | 36.3232° N, 127.3452° E            | 9.46                    | 2.16   |
| Dong-gu, Daegu               | 35.8866° N, 128.6353° E            | 8.52                    | 1.38   |
| Jangseungpo-ro, Geoje        | 34.8560° N, 128.7250° E            | 7.75                    | 1.89   |
| Noksan-ro, Jeju              | 33.3903° N, 126.7329° E            | 5.24                    | 0.96   |

256



257 **Total length of flowering branches of a typical cherry blossom tree in Korea**

258 Crown diameter of a typical cherry blossom tree (Table 4) was converted into total  
259 length of flowering branches (i.e., orders 1 and 2) using the conversion function (Fig. 4). The  
260 mean crown diameter of  $7.15 \pm 1.59$  m corresponded to  $394 \pm 191$  m in TLFB. The product of this  
261 length and the mean carbon mass per unit length of branch indicates that flowers of each tree  
262 harbor  $336 \pm 163$  g of carbon (Table 5).

263 **Estimation of total flower TC of cherry blossom trees across the country**

264 The number of cherry blossom street trees in South Korea was known as 1,540,000  
265 (Korea Forest Service, 2020)<sup>2</sup>. Therefore, approximately  $517 \pm 251$  tonnes of carbon could be  
266 quenched by harvesting cherry blossoms on streets of South Korea each year. The estimate  
267 corresponded to  $1,895 \pm 922$  tonnes of CO<sub>2</sub> equivalent.

268 Table 5. Total carbon content and CO<sub>2</sub> equivalent (in parenthesis) in cherry blossom street trees in South Korea

| Mean crown diameter (m) | Mean total branch length per tree (m) | Mean carbon mass per meter (gC/m) | Mean total carbon content of flowers per tree (g) | Number of cherry blossom street trees in South Korea (in 2019) | Total carbon content in cherry blossom street trees in South Korea (tonnes per year) |
|-------------------------|---------------------------------------|-----------------------------------|---------------------------------------------------|----------------------------------------------------------------|--------------------------------------------------------------------------------------|
| $7.15 \pm 1.59$         | $394 \pm 191$                         | 0.851                             | $336 \pm 163$<br>( $1231 \pm 599$ )               | 1,540,000                                                      | $517 \pm 251$<br>( $1,895 \pm 922$ )                                                 |

269

270

## Discussion

### 271 Evaluation of the estimated amount of CO<sub>2</sub> quenched by harvesting flowers

272 To scale the estimate of CO<sub>2</sub> that can be quenched by cherry blossom flowers across the country

273 each year, we intended to compare the value to a known value of annual CO<sub>2</sub> absorption by

274 cherry blossom trees. (Jo and Ahn, 2012)<sup>21</sup> have produced a function relating the diameter at

275 breast height ( $D_{BH}$ ) to the amount of CO<sub>2</sub> absorbed each year ( $Y$ ) for a cherry blossom:

276  $\ln Y = -3.0939 + 1.7702 \ln D$ . To estimate  $D_{BH}$  of a typical cherry blossom tree, a function

277 linking  $D_{BH}$  and the crown diameter was deduced (Fig. 5). Using both functions, the annual CO<sub>2</sub>

278 absorption for a cherry blossom tree of crown diameter  $7.15 \pm 1.59$  m (equivalent to  $32.2 \pm 8.8$  cm

279 of  $D_{BH}$ ) was estimated to be  $21.1 \pm 9.1$  kg. This value made the estimated CO<sub>2</sub> in the flowers of a

280 cherry blossom tree,  $1.23 \pm 0.60$  kg, to be 5.8% of the absorption by cherry blossom trees.

281

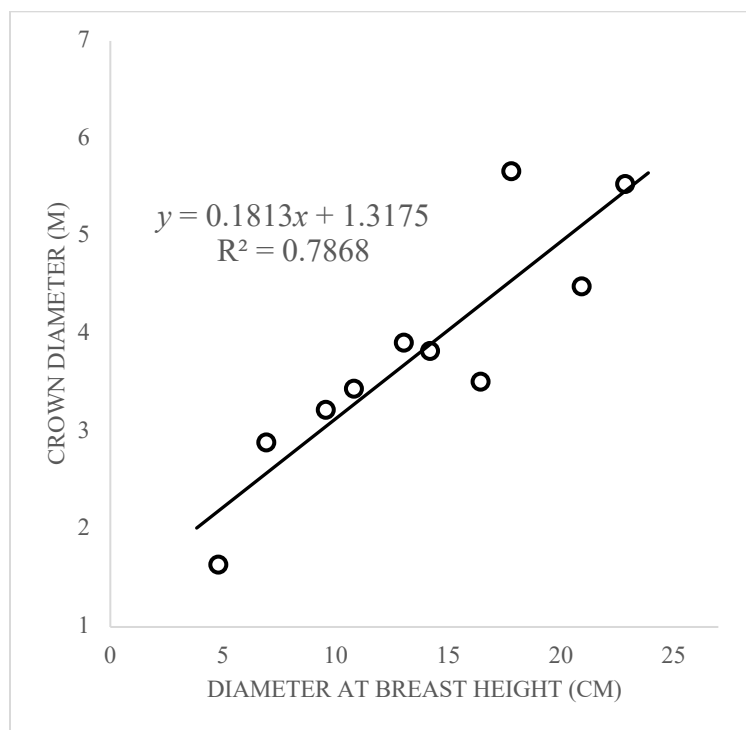

282  
283

Figure 5. Relationship between  $D_{BH}$  and the crown diameter based on (Jo and Ahn, 2012)<sup>21</sup>

284 **Equivalence to CO<sub>2</sub> emissions or other means of reduction**

285 The total CO<sub>2</sub> emission in Korea in 2019 was estimated to be 586 million tonnes (Korean  
286 Statistical Information Service, 2021)<sup>5</sup>. Therefore, 1,900 tonnes of CO<sub>2</sub> contained in cherry  
287 blossoms account for merely 0.00032% of the total annual CO<sub>2</sub> emission. However, the amount  
288 of reduction by harvesting them appears sizeable to other ways of carbon reduction, or emission  
289 rates by each well-known source.

290 To tackle the issue of excessive CO<sub>2</sub> production, the government has been implementing two  
291 major methods: planting trees and replacing fossil fuels with renewable energy sources. As for  
292 the former, one hectare of 30-year-old *Pinus densiflora* absorbs 10.8 tonnes of CO<sub>2</sub> (Korea  
293 Forest Service, 2019)<sup>6</sup>, making harvesting the blossoms nationwide each year equivalent to  
294 planting 176 hectares of pine trees, an area similar to 44 Wembley stadiums. Employing solar  
295 panels as one of the renewable energy sources, 304 tonnes of CO<sub>2</sub> emission could be decreased  
296 (if 1kW per 16.5 m<sup>2</sup>) in one hectare of land per year (Korea Energy News, 2018)<sup>7</sup>. Still,  
297 harvesting the blossoms would add 6 hectares of solar panels to existing 6120 hectares of panels  
298 in the country since 2015 (Hankyung Economy, 2020)<sup>8</sup>. Considering the cost of installing the  
299 panels, estimated to be 5.1 million pounds or 5.8 million USD for 6 hectares in 2018 (Renewable  
300 Energy Followers, 2021)<sup>9</sup>, collecting the flowers would be more cost-friendly while reducing  
301 carbon dioxide.

302 In addition, approximately 0.21 kg of CO<sub>2</sub> is emitted (The Seoul Institute, 2017)<sup>10</sup> when an  
303 internal combustion engine car travels for a kilometre while 1.23±0.60 kg of CO<sub>2</sub> equivalent is  
304 stored in cherry blossom flowers in a tree. This means harvesting the blossoms of one tree has a  
305 similar effect of offsetting CO<sub>2</sub> emission when a car travels for 5.9±2.9 km. A typical car in  
306 Korea runs for 37.9 km every day on average (Korea Transportation Safety Authority, 2020)<sup>11</sup>,

307 and emits 8.0 kg of CO<sub>2</sub> daily. Therefore, harvesting all cherry blossoms on streets across the  
308 country once in a year compensate the CO<sub>2</sub> cost for a daily operation of 0.24 million cars.

309

### 310 **Consequential impacts on the environment by harvesting cherry blossoms**

311 Decomposition is an essential process in nature to circulate the finite nutrients on Earth. Like  
312 other parts of plants, flowers are also decomposed by microorganisms in the soil, producing CO<sub>2</sub>  
313 and returning crucial elements such as nitrogen and phosphorous back into the soil for the roots  
314 to absorb. When the flowers are from wild cherry blossom trees, removing them from the  
315 environment by harvesting would interfere with the nutrient cycle by preventing their re-entry  
316 into the soil. However, most leaves or flowers fallen from street trees in Korea often do not enter  
317 the soil; instead, they are surrounded by concrete pedestrian ways and asphalt roads. The small  
318 area directly underneath the tree, less than 1 m<sup>2</sup>, of exposed soil would not be able to withhold all  
319 of the fallen flowers. Moreover, the nutrient contents have already been artificially maintained  
320 for street trees by applying fertilisers to meet nutritional requirements for a tree to grow, as they  
321 are cultivated trees in a sense. The environmental nuisance is a primary issue after the majority  
322 of flowers fall. Accumulated flower petals can cause blockages in the sewage system or  
323 inconveniences on roadways and walkways. They are then collected by public cleaners and  
324 burned away as garbage, releasing more CO<sub>2</sub>. Although there would be emission due to the  
325 transport of the collected flowers, it would not be as significant as the emission by combusting; it  
326 would be more environmentally friendly to reuse the petals after harvesting rather than burning  
327 them.

328

### 329 **Use of harvested cherry blossom flowers**

330 The authors suggest that the carbon-reducing effect of harvesting cherry blossom flowers is both  
331 feasible and substantial as indicated by this small investigation. The question on cost-effective  
332 ways of disposing or using the blossoms after harvesting, with minimum carbon emission,  
333 therefore arises. In East Asia, there is a long history of using parts of the cherry blossom tree,  
334 including the flowers, as herbal medicine or bioactive compounds. Therefore, industrial or  
335 commercial value can be added by using the harvested flowers as substances for commercial  
336 products, which will motivate flower harvesting and compensate for the costs of harvesting.  
337 Nutritional use of flowers can be a traditional example; fresh flowers may have values as animal  
338 feed for both terrestrial and aquatic animals, replacing perishable feed ingredients produced by  
339 agriculture in spring season. Dried flowers may provide fibers or biomass components for animal  
340 feed. The recent development of making cherry flower waste-derived activated carbon with self-  
341 doped nitrogen as a supercapacitor and sodium-ion battery could be a cutting-edge industrial  
342 application of the harvested flowers (Bhattarai et al, 2022)<sup>12</sup>. Higher commercial values can be  
343 also found for harvested cherry blossom flowers as described below.

### 344 **Pharmaceutical and cosmetic use of cherry blossom extracts**

345 The extracts from cherry blossoms, particularly the species *P. × yedoensis*, were found out to  
346 have proven effects of skin protection against solar UV (sUV) light. In particular, the protein  
347 expression of an enzyme crucial for collagen decomposition due to sUV exposure,  
348 metalloproteinase-1 (MMP-1), was reduced in the presence of non-enzymatic cherry blossom  
349 petal extract (Jung et al., 2021)<sup>13</sup>. This indicates that the extract slows down the degradation of  
350 collagen, critical for skin elasticity, implying the role of the blossoms as an anti-wrinkle agent.  
351 The idea of using the blossom extract as an antiphotaging agent was reinforced by the research

352 that demonstrated its ability to protect human keratinocytes from ultraviolet B radiation-induced  
353 oxidative stress and apoptosis by regulating critical proteins and pathways involved in the  
354 process (Wang et al., 2019)<sup>14</sup>. Furthermore, 0.5-2.0% cherry blossom extract has the effect of  
355 reducing NO production during skin inflammation, preventing DNA damage and mutations  
356 (Zhang et al., 2014)<sup>15</sup>. Therefore, the harvested cherry blossom flowers can be exploited in  
357 skincare products as anti-wrinkle, anti-oxidative and pharmaceutical anti-inflammatory agents  
358 that would also be able to produce economic benefits.

### 359 **Decomposition in a controlled manner**

360 As mentioned above, much of the cherry blossoms currently collected by street cleaners are  
361 burnt in furnaces. An alternative route for the cherry blossoms if not harvested could be  
362 discharged into ecosystems through water drainage or trashed as other wet trashes in municipal  
363 compost heaps. However, if harvested intentionally for commercial purposes, its decomposition  
364 can be controlled in human-maintained facilities. Not all of carbon in the blossoms can be  
365 preserved. Yet, carbon emission can be better processed and thus reduced than the case of natural  
366 decomposition. Nowadays, biofuel production by biomass decomposition is a common practice  
367 (Yuan, 2008)<sup>16</sup>, so that flower decomposition can be coupled to production of renewable fuel  
368 partially replacing the use of fossil fuels. Materials after controlled decomposition could be  
369 considered as mineral compounds, and it can be used as fertilisers for plant growth. Therefore,  
370 flower harvesting can replace some costs for fertilisers. Although there cannot be a waste-free  
371 process, results of this study encourage further studies on the ways to utilise the flowers, and the  
372 analysis of the cost and benefits entailed by flower harvesting using a more complete life cycle  
373 analysis.

374  
375  
376  
377  
378  
379  
380  
381  
382  
383  
384  
385  
386

## Conclusion

In conclusion, harvesting cherry blossom flowers reduces a substantial amount of atmospheric carbon. 1.9 thousand tonnes of CO<sub>2</sub> emission, which corresponds to 0.00032% of the total annual CO<sub>2</sub> emission by all industrial and natural emission processes in Korea, can be reduced by the harvesting. The amount corresponded to planting 176 hectares of pine trees and 0.24 million car operations for a day. Because their extracts can be used extensively for cosmetic products, motivation could exist to harvest them commercially. The environmental costs for harvesting and disposal after component extraction need to be considered as well to implement this suggestion in the real world. This waste product of cherry trees, fallen onto the streets could become an alternative to other virgin materials, e.g., for animal feed. Whilst using mineralised carbon from cherry flower as electronic or ion-battery parts has already been suggested. Cherry blossoms are feasible renewable sources captured carbon and the careful collection and use of this waste could reduce the net carbon footprint on a global scale.

387

## References

- 388 1: Crowther Lab of ETH Zurich. (2019 Jul 04). *How trees could help to save the climate\**.  
389  
390 2: Korea Forest Service. (2020). *National street tree composition at the end of 2019*.  
391  
392 3: Kim, C. (1998). *Distribution and taxonomic study of Prunus yedoensis Matsumura (Rosaceae)*. Jeju University, South Korea.  
393  
394 4: Eloy, C., Fournier, M., Lacoïnte, A., et al. (2017). *Wind loads and competition for light sculpt trees into self-similar structures*.  
395 Nat Commun 8, 1014.  
396  
397 5: Korean Statistical Information Service. (2021). *Greenhouse gas emissions (CO2 eq)*.  
398  
399 6: Korea Forest Service. (2019). *Major species' carbon absorption statistics*. Carbon Registry Department.  
400  
401 7: Jo, S-G. (2018 Nov 19). "Solar generation, CO2 reduction effect is 30 times than trees". Korea Energy News (Home Ed.).  
402  
403 8: Sung, S-Y. (2020 Dec 14). *Solar power exhibits extreme inefficiency... installation cost is 5 times nuclear power, twice the*  
404 *electric production cost*. Hankyung Economy (Home Ed.).  
405  
406 9: Lee, J-W. (2018 Jun 22). *100kW electricity production cost for solar generation facility '170 million KRW'*. The Korean  
407 *Agriculture Newspaper (Home Ed.)*.  
408  
409 10: Koh J-H of The Seoul Institute. (2017). *Carbon emission reduction trend 'Evident' in transportation, policy for demand for*  
410 *transportation should be proceeded*. iP issue paper 2018.  
411  
412 11: Korean Statistical Information Service. (2022). *Car driving distances based on purposes, car models and regions*.  
413  
414 12: Bhattarai, R.M., Kisan, C., Subramanian N., et al. (2022). *Activated carbon derived from cherry flower biowaste with a self-*  
415 *doped heteroatom and large specific surface area for supercapacitor and sodium-ion battery applications*. Chemosphere, 2022  
416 Sep;303(Pt 3):135290.  
417  
418 13: Jung Y-A, Lee J-Y, Lee P, Shin H-S, Kim J-E. *Inhibition of Solar UV-Induced Matrix Metalloproteinase (MMP)-1*  
419 *Expression by Non-Enzymatic Softening Cherry Blossom (Prunus yedoensis) Extract*. Plants. 2021; 10(5):1016.  
420  
421 14: Wang, Y., Li, W., Xu, S. et al. *Protective skin aging effects of cherry blossom extract (Prunus Yedoensis) on oxidative stress*  
422 *and apoptosis in UVB-irradiated HaCaT cells*. Cytotechnology 71, 475–487 (2019).  
423  
424 15: Y. Q. Zhang, L. Guan, Z. Y. Zhong., et al. (2014). *The anti-inflammatory effect of cherry blossom extract (Prunus yedoensis)*  
425 *used in soothing skincare product*.  
426  
427 16: Joshua S. Yuan, Kelly H. Tiller, Hani Al-Ahmad. et al. *Plants to power: bioenergy to fuel the future*. Trends in Plant Science,  
428 Volume 13, Issue 8, 2008, Pages 421-429, ISSN 1360-1385  
429  
430 17: Tadeusz, J., Tomasz, L. & Łukasz, S. (2021). *Basic shoot characteristics predict the cropping potential of young sweet*  
431 *cherry (Prunus avium L.) trees*, New Zealand Journal of Crop and Horticultural Science, 49:1, 63-73,  
432  
433 18: Hrotkó, K., Csigai, K., Magyar, L., & Hrotkó, V. (2008). *PRODUCTIVITY OF FRUITING WOOD ON SLENDER SPINDLE*  
434 *SOUR CHERRY TREES*. Acta Hort. 795, ISHS: 503-507  
435  
436 19: Han B, Jung J, Na HA, et al. (2022). *Current status of cherry trees (Prunus subg. Cerasus) planted in Korea: A case study of*  
437 *Bundang Central Park and adjacent area*. Korean J. Pl. Taxon. 2022;52 (1): 54-63.  
438  
439 20: Ma, S., He, F., Tian, D., Zou, D., et al. (2018). *Variations and determinants of carbon content in plants: a global synthesis*,  
440 *Biogeosciences*, 15, 693–702  
441  
442 21: Jo, H-K., Ahn, T-W. (2012). *Carbon Storage and Uptake by Deciduous Tree Species for Urban Landscape*. Journal of the  
443 *Korean Institute of Landscape Architecture* 153: 40(5)  
444  
445 22: Climeworks.com. *Direct air capture: our technology to capture CO<sub>2</sub>*
